# Supplementary material for: Matrine combined with Osthole inhibited the PERK apoptosis of splenic lymphocytes in PCV2-infected mice model
Source: Research Square preprint supplement (doi:10.21203/rs.3.rs-627445/v1), 2021-06-21
Supplement: Supplementary file 1 [file 9a1d5d16792875672caad6ef.docx]

**Matrine combined with Osthole inhibited the PERK apoptosis of splenic lymphocytes in PCV2-infected mice model**

Yinlan Xu1,2#, Shuangxiu Wan1,6#, Panpan Sun3, Ajab Khan1, Jianhua Guo4, Xiaozhong Zheng5, Yaogui Sun1, Kuohai Fan3, Wei Yin1, Hongquan Li1 and Na Sun1*

**#These authors contributed equally to this work.**

***Corresponding author: Na Sun**：E-mail: [snzh060511@126.com](mailto:snzh060511@126.com)

College of Veterinary Medicine, Shanxi Agricultural University, Taigu, Shanxi 030801 China.

**Original blot image of 7A and 7b**

**a** GRP78 of Fig. 7a


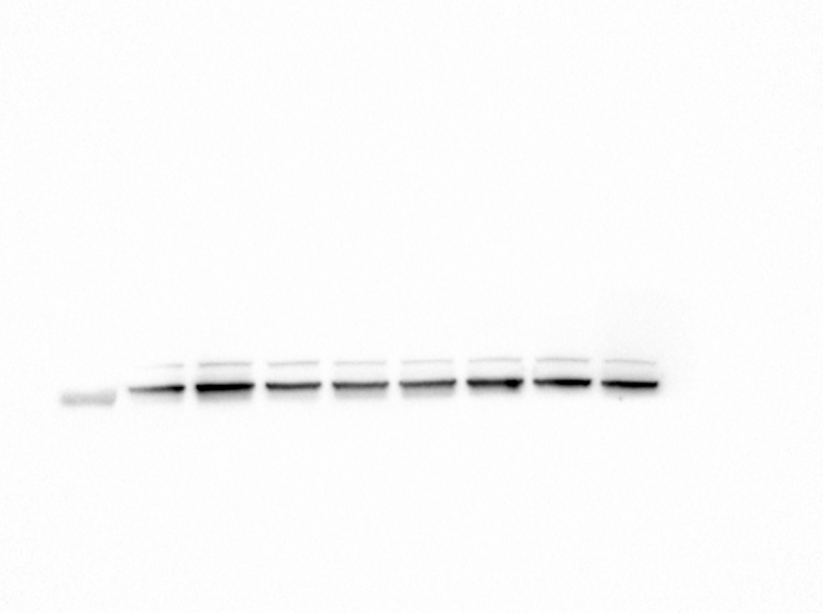


**GRP78**

**(78KDa)**

**PCV2 group**

**Normal control**

**High group (10+3)mg/kg**

**Matrine 40 mg/kg**

**Low group (40+12)mg/kg**

**Ribavirin 40 mg/kg**

**Middle group (20+6)mg/kg**

**Osthole 12 mg/kg**

**b** p-PERK of Fig. 7a


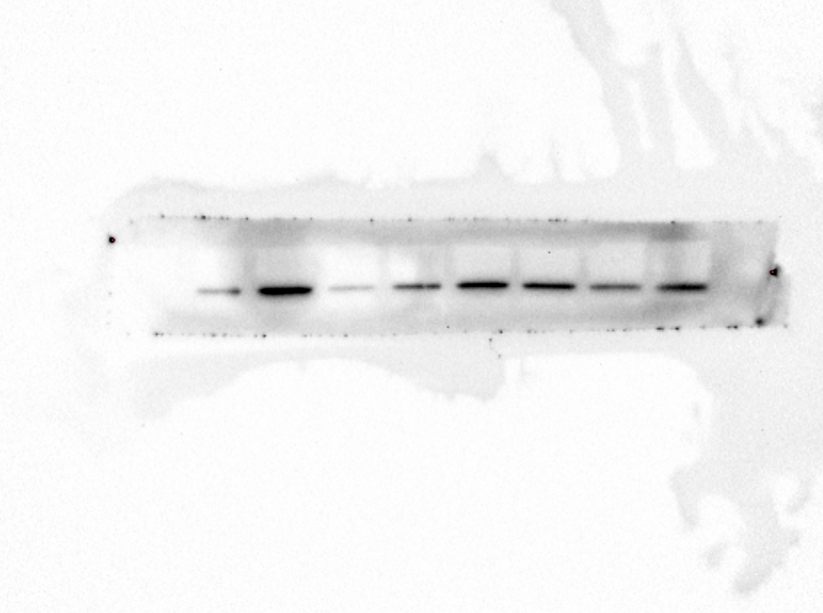


**p-PERK (150KDa)**

**PCV2 group**

**Normal control**

**High group (10+3)mg/kg**

**Matrine 40 mg/kg**

**Low group (40+12)mg/kg**

**Ribavirin 40 mg/kg**

**Middle group (20+6)mg/kg**

**Osthole 12 mg/kg**

**c** t-PERK of Fig. 7a


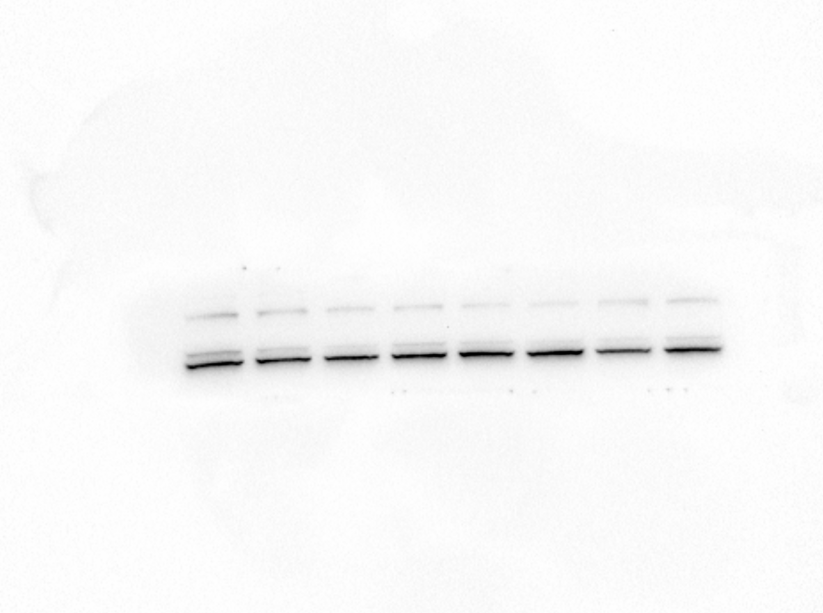


**p-PERK (150KDa)**

**PCV2 group**

**Normal control**

**High group (10+3)mg/kg**

**Matrine 40 mg/kg**

**Low group (40+12)mg/kg**

**Ribavirin 40 mg/kg**

**Middle group (20+6)mg/kg**

**Osthole 12 mg/kg**

**d** GAPDH of Fig. 7a


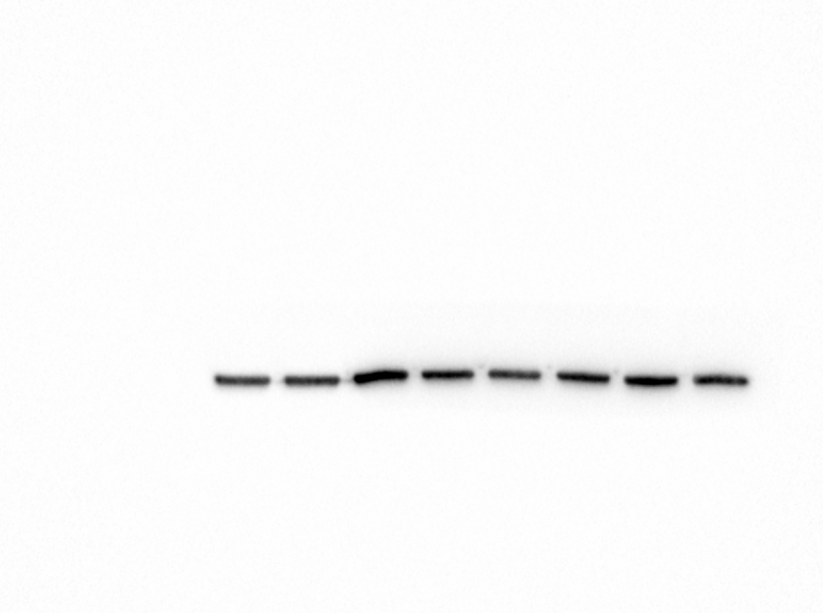


**GAPDH**

**(36KDa)**

**PCV2 group**

**Normal control**

**High group (10+3)mg/kg**

**Matrine 40 mg/kg**

**Low group (40+12)mg/kg**

**Ribavirin 40 mg/kg**

**Middle group (20+6)mg/kg**

**Osthole 12 mg/kg**

**e** p-eIF2α of Fig. 7b


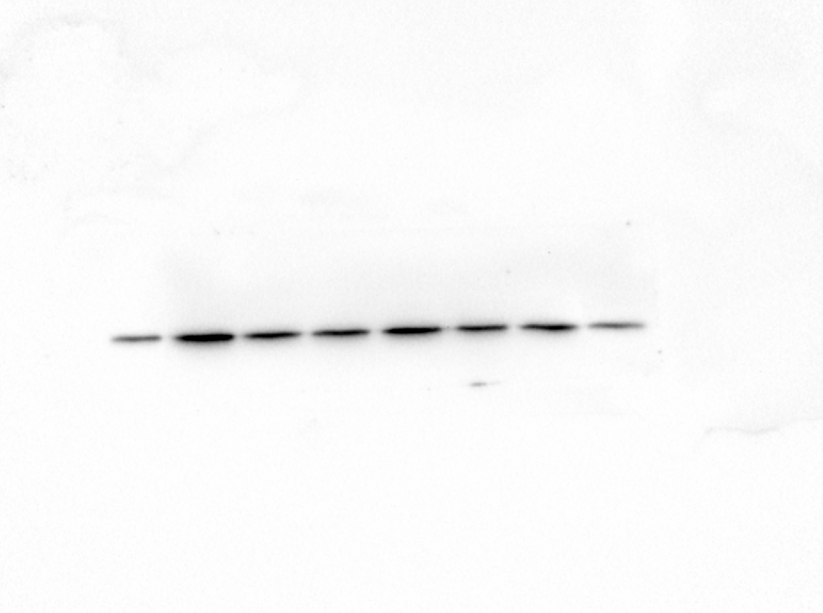


**P-eIF2α**

**(36KDa)**

**PCV2 group**

**Normal control**

**High group (10+3)mg/kg**

**Matrine 40 mg/kg**

**Low group (40+12)mg/kg**

**Ribavirin 40 mg/kg**

**Middle group (20+6)mg/kg**

**Osthole 12 mg/kg**

**f** t-eIF2α of Fig. 7b

**t-eIF2α**

**(65KDa)**

**PCV2 group**

**Normal control**

**High group (10+3)mg/kg**

**Matrine 40 mg/kg**

**Low group (40+12)mg/kg**

**Ribavirin 40 mg/kg**

**Middle group (20+6)mg/kg**

**Osthole 12 mg/kg**


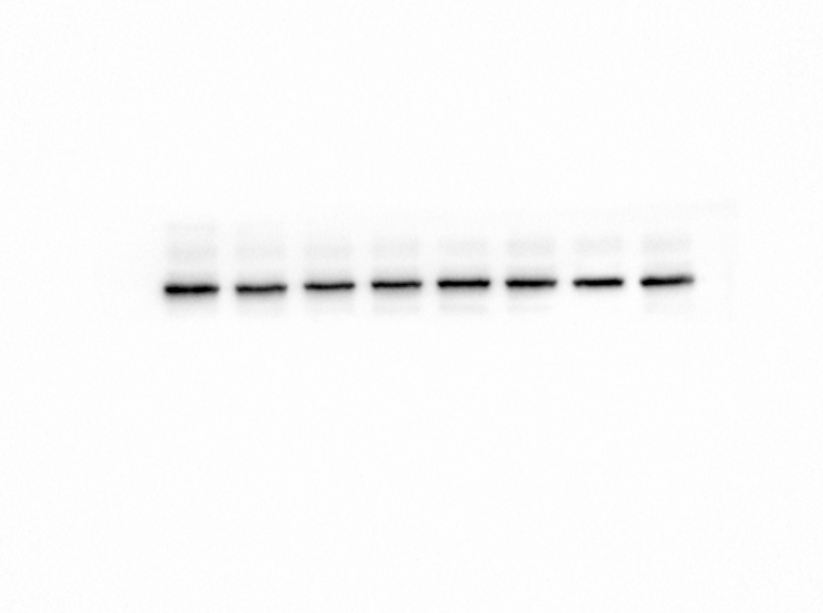


**g** ATF4 of Fig. 7b


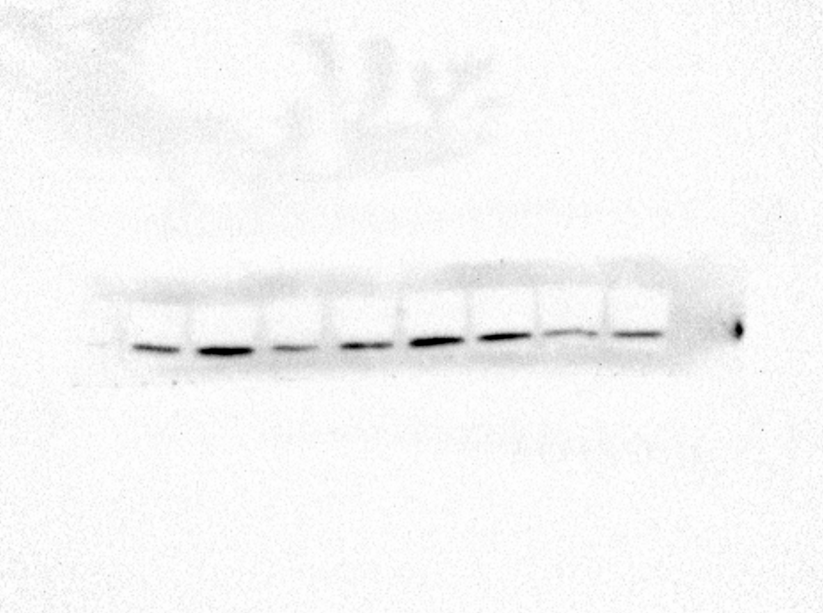


**ATF4**

**(76KDa)**

**PCV2 group**

**Normal control**

**High group (10+3)mg/kg**

**Matrine 40 mg/kg**

**Low group (40+12)mg/kg**

**Ribavirin 40 mg/kg**

**Middle group (20+6)mg/kg**

**Osthole 12 mg/kg**

**h** CHOP of Fig. 7b

**CHOP**

**(27KDa)**

**PCV2 group**

**Normal control**

**High group (10+3)mg/kg**

**Matrine 40 mg/kg**

**Low group (40+12)mg/kg**

**Ribavirin 40 mg/kg**

**Middle group (20+6)mg/kg**

**Osthole 12 mg/kg**


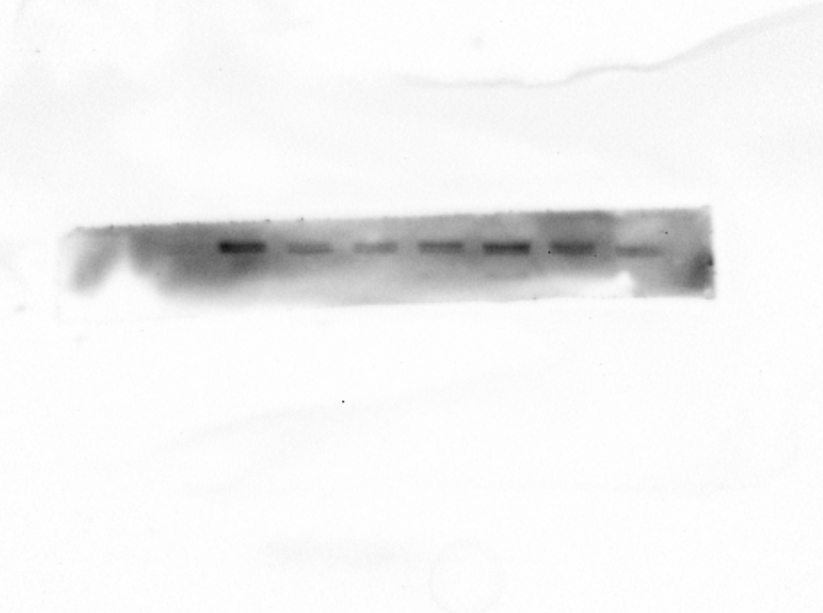


**i** GAPDH of Fig. 7b


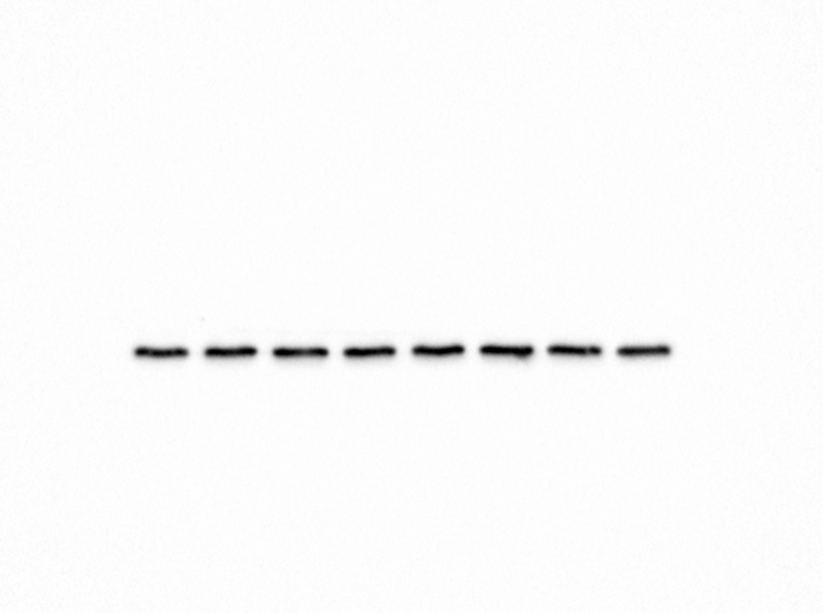
y

**GAPDH**

**(36KDa)**

**PCV2 group**

**Normal control**

**High group (10+3)mg/kg**

**Matrine 40 mg/kg**

**Low group (40+12)mg/kg**

**Ribavirin 40 mg/kg**

**Middle group (20+6)mg/kg**

**Osthole 12 mg/kg**
